# Supplementary material for: Simple and Efficient Pressure Ulcer Reconstruction via Primary Closure Combined with Closed-Incision Negative Pressure Wound Therapy (CiNPWT)—Experience of a Single Surgeon
Source: MDPI journal article supplement (doi:10.3390/jpm12020182), 2022-01-29
Supplement: s1 [file s1]

| Patient | Wound | Sex | Age | Type of defect | Cause of defect                                                                                                                          | Co-morbidities                                                                    | Wound culture                                                                                                                                  | Debridement (times) | Flap type | Follow months | Operation time | wound size (cm2) | Hospital stay (day) | Healed | Minor complication | Major complication | Mortality |
|---------|-------|-----|-----|----------------|------------------------------------------------------------------------------------------------------------------------------------------|-----------------------------------------------------------------------------------|------------------------------------------------------------------------------------------------------------------------------------------------|---------------------|-----------|---------------|----------------|------------------|---------------------|--------|--------------------|--------------------|-----------|
| 1       | 1     | F   | 96  | Sacral         | Spinal cord compression, T11/12 level due to disk bulging and corresponding flaval ligament hypertrophy with monoparesis, left lower leg | HTN, PAOD, CKD, Hyperlipidemia, Depressive disorder, Hyperuricemia                | *. Pseudo. aeruginosa<br>*. Enterococcus faecalis<br>*. Bacteroides fragilis                                                                   | 2                   | PC+CiNPWT | 22            | 36             | 35               | 21                  | 1      | 0                  | 0                  | 0         |
| 2       | 2     | F   | 90  | Sacral         | Dementia                                                                                                                                 | DM2, SSS, Hx of pacemaker implantation, Hyperlipidemia, Major depression disorder | *. Staphylococcus aureus<br>*. Proteus mirabilis<br>*. Escherichia coli<br>*. Bacteroides fragilis                                             | 2                   | PC+CiNPWT | 14            | 41             | 70               | 30                  | 1      | 0                  | 0                  | 0         |
| 3       | 3     | F   | 67  | Sacral         | Parkinson's disease                                                                                                                      | nil                                                                               | *. Proteus mirabilis                                                                                                                           | 2                   | PC+CiNPWT | 22            | 49             | 63               | 31                  | 1      | 0                  | 0                  | 0         |
| 4       | 4     | F   | 84  | Sacral         | Old CVA                                                                                                                                  | HTN, DM2                                                                          | *. Morganella morganii<br>*. Escherichia coli<br>*. Veillonella spp.<br>*. Bacteroides fragilis<br>*. Fusobacterium nucleatum                  | 2                   | PC+CiNPWT | 3             | 46             | 130              | 55                  | 0      | 1                  | 0                  | 0         |
| 5       | 5     | F   | 84  | Sacral         | Old CVA                                                                                                                                  | HTN, DM2                                                                          | 0                                                                                                                                              | 1                   | PC+CiNPWT | 12            | 42             | 63               | 26                  | 1      | 0                  | 0                  | 0         |
| 6       | 6     | F   | 91  | Sacral         | Fracture of intertrochanter of femur                                                                                                     | DM, HTN, Old CVA                                                                  | *. Enterobacter cloacae<br>*. Enterococcus faecium<br>*. Bacteroides fragilis<br>*. Peptostrepto. Anaerobicus<br>*. Viridans streptococcus gr. | 3                   | PC+CiNPWT | 18            | 27             | 54               | 32                  | 1      | 0                  | 0                  | 0         |
| 7       | 7     | F   | 71  | Right ischial  | Spinal hemorrhage complicated spinal cord compression with paralysis s/p decompression                                                   | nil                                                                               | *. Enterococcus faecalis<br>*. Peptostrepto. Magnus<br>*. Bacteroides fragilis<br>*. Bacteroides ovatus<br>*. Bact. thetaiotaomicron           | 2                   | PC+CiNPWT | 16            | 34             | 24               | 19                  | 1      | 0                  | 0                  | 0         |
| 8       | 8     | F   | 79  | Sacral         | L4 compression fracture with spinal stenosis (Proved MRI of L-spine was performed on 109/03/17 in 松山), with bed ridden.                  | nil                                                                               | *. Pseudo. Aeruginosa<br>*. Viridans streptococcus gr.<br>*. Bacteroides fragilis<br>*. Bacteroides uniformis                                  | 2                   | PC+CiNPWT | 3             | 39             | 40               | 35                  | 1      | 0                  | 0                  | 0         |
| 9       | 9     | M   | 76  | Sacral         | Old CVA                                                                                                                                  | DM2, HTN, Hyperlipidemia                                                          | *. Klebsiella pneumoniae<br>*. Pseudo. Aeruginosa<br>*. Bacteroides vulgatus                                                                   | 4                   | PC+CiNPWT | 20            | 52             | 110              | 61                  | 0      | 1                  | 0                  | 0         |
| 10      | 10    | M   | 63  | Sacral         | CNS tumor                                                                                                                                | HTN                                                                               | *. Escherichia coli<br>*. Candida albicans<br>*. Bact. Thetaiotaomicron                                                                        | 2                   | PC+CiNPWT | 13            | 31             | 48               | 30                  | 1      | 0                  | 0                  | 0         |
| 11      | 11    | M   | 85  | Sacral         | Alzheimer's disease                                                                                                                      | HTN, COPD                                                                         | *. Escherichia coli                                                                                                                            | 1                   | PC+CiNPWT | 14            | 45             | 20               | 30                  | 1      | 0                  | 0                  | 0         |

|    |    |   |    |                  |                                                                                                                                                                                                                                 |                           |                                                                                                                                                                                          |   |           |      |     |     |     |   |   |   |   |
|----|----|---|----|------------------|---------------------------------------------------------------------------------------------------------------------------------------------------------------------------------------------------------------------------------|---------------------------|------------------------------------------------------------------------------------------------------------------------------------------------------------------------------------------|---|-----------|------|-----|-----|-----|---|---|---|---|
| 12 | 12 | M | 95 | Sacral           | Senile dementia                                                                                                                                                                                                                 | HTN                       | *. Escherichia coli<br>*. Pseudo. aeruginosa<br>*. Peptostrepto. asaccharolyticus<br>*. Acineto. baumannii<br>*. Staphylococcus aureus                                                   | 2 | VY        | 6    | 54  | 100 | 42  | 1 | 0 | 0 | 0 |
| 12 | 13 | M | 95 | L't trochanteric | Senile dementia                                                                                                                                                                                                                 | HTN                       | *. Escherichia coli<br>*. Pseudo. aeruginosa<br>*. Peptostrepto. asaccharolyticus<br>*. Acineto. baumannii<br>*. Staphylococcus aureus                                                   | 3 | pALT      | 4.5  | 221 | 90  | 86  | 1 | 0 | 0 | 0 |
| 12 | 14 | M | 95 | Right hip        | Senile dementia                                                                                                                                                                                                                 | HTN                       | *. Escherichia coli<br>*. Pseudo. aeruginosa<br>*. Peptostrepto. asaccharolyticus<br>*. Acineto. baumannii<br>*. Staphylococcus aureus                                                   | 5 | PC+CiNPWT | 3.25 | 81  | 32  | 86  | 1 | 0 | 0 | 0 |
| 13 | 15 | F | 73 | Sacral           | Parkinsonism                                                                                                                                                                                                                    | DM2                       | *. Staphylococcus aureus<br>*. Coagulase Negative Staphylococcus<br>*. Corynebacterium spp.<br>*. Bact. thetaiotaomicron<br>*. Peptostrepto. Asaccharolyticus<br>*. Peptostrepto. Magnus | 1 | PC+CiNPWT | 18   | 31  | 63  | 46  | 1 | 0 | 0 | 0 |
| 14 | 16 | F | 79 | Sacral           | Senile dementia                                                                                                                                                                                                                 | CHF, ESRD, HTN, DM2, VHD  | *. Candida albicans<br>*. Enterococcus faecium<br>*. Pseudo. aeruginosa<br>*. Acinetobacter nosocomialis<br>*. Enterobacter cloacae                                                      | 4 | PC+CiNPWT | 18   | 26  | 80  | 63  | 0 | 1 | 0 | 0 |
| 15 | 17 | M | 73 | Sacral           | Major depressive disorder                                                                                                                                                                                                       | HTN                       | *. Bacteroides fragilis                                                                                                                                                                  | 2 | PC+CiNPWT | 3    | 39  | 90  | 22  | 1 | 0 | 0 | 0 |
| 16 | 18 | M | 52 | Sacral           | Ruptured cerebral aneurysm                                                                                                                                                                                                      | nil                       | *. Enterococcus faecalis<br>*. Pseudo. aeruginosa<br>*. Peptostrepto. Anaerobicus                                                                                                        | 2 | PC+CiNPWT | 12   | 37  | 102 | 23  | 1 | 0 | 0 | 0 |
| 17 | 19 | M | 87 | Sacral           | Alzheimer's disease                                                                                                                                                                                                             | nil                       | *. Enterococcus faecium<br>*. Pseudo. aeruginosa<br>*. Candida albicans                                                                                                                  | 2 | PC+CiNPWT | 13   | 44  | 70  | 50  | 0 | 1 | 0 | 0 |
| 18 | 20 | M | 90 | Sacral           | Hypoxic encephalopathy                                                                                                                                                                                                          | CKD, COPD, Hypothyroidism | *. Enterococcus raffinosus<br>*. Bact. thetaiotaomicron                                                                                                                                  | 2 | PC+CiNPWT | 1    | 56  | 198 | 43  | 0 | 1 | 0 | 1 |
| 19 | 21 | F | 89 | Sacral           | Senile dementia                                                                                                                                                                                                                 |                           | *. Streptococcus anginosus group<br>*. Bacteroides fragilis<br>*. Bact. distasonis                                                                                                       | 2 | PC+CiNPWT | 9    | 41  | 48  | 22  | 1 | 0 | 0 | 0 |
| 20 | 22 | M | 26 | Sacral           | Highly suspected Bickerstaff's brainstem encephalitis, also involves spinal cord with completely paraplegia, hypoesthesia (sensory level at T7-8 dermatome), and motor axonal neuropathy variant type, complicated with seizure | nil                       | *. Pseudo. Aeruginosa<br>*. Klebsiella pneumoniae<br>*. Candida albicans<br>*. Diphtheroid                                                                                               | 2 | PC+CiNPWT | 18   | 54  | 130 | 67  | 1 | 0 | 0 | 0 |
| 21 | 23 | M | 61 | Sacral           | Cervical spinal cord injury                                                                                                                                                                                                     | nil                       | *. Pseudo. Aeruginosa<br>*. Enterococcus casseliflavus                                                                                                                                   | 2 | PC+CiNPWT | 5    | 36  | 24  | 138 | 0 | 1 | 0 | 0 |

|    |    |   |    |                   |                               |                                              |                                                                                                                                                                       |   |                    |      |     |     |    |   |   |   |   |
|----|----|---|----|-------------------|-------------------------------|----------------------------------------------|-----------------------------------------------------------------------------------------------------------------------------------------------------------------------|---|--------------------|------|-----|-----|----|---|---|---|---|
| 22 | 24 | M | 86 | Sacral            | *. Hip Fx s/p ORIF            | HTN                                          | 0                                                                                                                                                                     | 1 | PC+CiNPWT          | 1    | 22  | 40  | 15 | 1 | 0 | 0 | 0 |
| 23 | 25 | F | 66 | Right hip         | ICH                           | nil                                          | 0                                                                                                                                                                     | 5 | pALT               | 5.25 | 126 | 104 | 75 | 1 | 0 | 0 | 1 |
| 23 | 26 | F | 66 | Sacral            | ICH                           | nil                                          | 0                                                                                                                                                                     | 4 | PC+CiNPWT          | 1.5  | 52  | 120 | 75 | 1 | 0 | 0 | 1 |
| 24 | 27 | M | 58 | Sacral            | Old CVA                       | HTN, DM2                                     | 0                                                                                                                                                                     | 3 | PC+CiNPWT          | 1    | 57  | 117 | 20 | 1 | 0 | 0 | 0 |
| 25 | 28 | F | 69 | Left hip          | Hydrocephalus                 | HTN, DM2                                     | *. Bacteroides fragilis<br>*. Peptostrepto. magnus                                                                                                                    | 2 | PC+CiNPWT          | 16   | 24  | 56  | 27 | 1 | 0 | 0 | 0 |
| 25 | 29 | F | 69 | Right hip         | Hydrocephalus                 | HTN, DM2                                     | *. Escherichia coli<br>*. Peptostrepto. Magnus<br>*. Viridans streptococcus gr.                                                                                       | 1 | PC+CiNPWT          | 1.5  | 33  | 20  | 17 | 1 | 0 | 0 | 0 |
| 26 | 30 | F | 94 | Right hip         | Senile dementia               | Arrythmia,<br>Hyperlipidemia, CKD,<br>VHD    | *. Staphylococcus aureus<br>*. Pseudo. aeruginosa                                                                                                                     | 2 | PC+CiNPWT          | 1    | 21  | 54  | 17 | 1 | 0 | 0 | 0 |
| 27 | 31 | M | 74 | Left hip          | Old CVA                       | DM, HTN.                                     | *. Staphylococcus aureus                                                                                                                                              | 2 | PC+CiNPWT          | 1    | 24  | 30  | 14 | 1 | 0 | 0 | 0 |
| 28 | 32 | M | 75 | Right hip         | Hip fx s/p THR                | DM2                                          | *. Staphylococcus aureus<br>*. Providence stuartii<br>*. Proteus mirabilis<br>*. B-Streptococcus Non-A,B,D<br>*. Bacteroides fragilis<br>*. Peptostrepto. anaerobicus | 2 | PC+CiNPWT          | 5    | 25  | 24  | 19 | 1 | 0 | 0 | 0 |
| 29 | 33 | M | 94 | Sacral            | Senile dementia               | HTN, CAD, Sick sinus<br>syndrome (arrythmia) | 0                                                                                                                                                                     | 1 | PC+CiNPWT          | 3    | 45  | 54  | 19 | 1 | 0 | 0 | 0 |
| 30 | 34 | F | 97 | Right back        | Alzhiemer disease             | HTN                                          | No growth                                                                                                                                                             | 4 | Primary<br>closure | 24   | 50  | 42  | 26 | 1 | 0 | 0 | 0 |
| 31 | 35 | F | 82 | Sacral            | Parkinsonism                  | HTN, DM2,<br>Parkinsonism, HIVD,<br>MDD      | No growth                                                                                                                                                             | 1 | V-Y                | 24   | 110 | 42  | 17 | 1 | 0 | 0 | 0 |
| 32 | 36 | M | 91 | Sacral            | Stroke                        | CAD, DM, HTN                                 | Pseudo. aeruginosa, Bacteroides<br>fragilis                                                                                                                           | 3 | V-Y                | 1.5  | 95  | 66  | 67 | 1 | 0 | 0 | 1 |
| 32 | 37 | M | 91 | L't<br>trochanter | Stroke                        | CAD, DM, HTN                                 | Pseudo. aeruginosa, Bacteroides<br>fragilis                                                                                                                           |   | Hatchet flap       | 1    | 160 | 120 | 67 | 1 | 0 | 0 | 1 |
| 33 | 38 | M | 79 | Sacral            | Head injury with ICH          | HTN, CAD, DM2                                | Viridans streptococcus,<br>Eubacterium lentum                                                                                                                         | 2 | V-Y                | 24   | 77  | 42  | 32 | 0 | 1 | 0 | 0 |
| 34 | 39 | F | 60 | Sacral            | Old CVA with right hemiplegia | Nil                                          | Pseudo. aeruginosa                                                                                                                                                    | 5 | V-Y                | 24   | 63  | 48  | 44 | 1 | 0 | 0 | 0 |
| 34 | 40 | F | 60 | R't<br>trochanter | Old CVA with right hemiplegia | Nil                                          | Pseudo. aeruginosa                                                                                                                                                    | 3 | Primary<br>closure | 15   | 31  | 60  | 44 | 0 | 1 | 0 | 0 |

|    |    |   |    |                |                                      |                                                                  |                                                       |   |                  |      |     |     |     |   |   |   |   |
|----|----|---|----|----------------|--------------------------------------|------------------------------------------------------------------|-------------------------------------------------------|---|------------------|------|-----|-----|-----|---|---|---|---|
| 35 | 41 | F | 83 | Sacral         | Compression fracture of the L1       | DM                                                               | Mixed flora                                           | 2 | V-Y              | 14   | 88  | 55  | 40  | 1 | 0 | 0 | 0 |
| 35 | 42 | F | 83 | upper back     | Compression fracture of the L1       | DM                                                               | Mixed flora                                           | 2 | Primary closure  | 14   | 35  | 50  | 40  | 1 | 0 | 0 | 0 |
| 35 | 43 | F | 83 | L't chest wall | Compression fracture of the L1       | DM                                                               | Mixed flora                                           | 1 | Primary closure  | 14   | 45  | 36  | 40  | 1 | 0 | 0 | 0 |
| 36 | 44 | F | 88 | Sacral         | Stroke                               | DM, CAD, CHF, Hyperlipidemia, atrial fibrillation, Hyperuricemia | Escherichia coli, MRSA                                | 2 | Primary closure  | 17   | 42  | 9   | 93  | 1 | 0 | 0 | 0 |
| 37 | 45 | F | 83 | Sacral         | Stroke                               | HTN                                                              | Escherichia coli, Bact. Thetaiotaomicron              | 2 | V-Y              | 19   | 63  | 40  | 30  | 1 | 0 | 0 | 0 |
| 38 | 46 | F | 84 | R't trochanter | Dementia                             | HTN, DM                                                          | Klebsiella pneumoniae, Enterococcus faecalis          | 2 | Primary closure  | 3.75 | 30  | 25  | 54  | 1 | 0 | 0 | 0 |
| 38 | 47 | F | 84 | L't trochanter | Dementia                             | HTN, DM                                                          | Klebsiella pneumoniae, Enterococcus faecalis          | 2 | Primary closure  | 3.5  | 26  | 30  | 54  | 1 | 0 | 0 | 0 |
| 38 | 48 | F | 84 | Sacral         | Dementia                             | HTN, DM                                                          | Klebsiella pneumoniae, Enterococcus faecalis          | 5 | SGAP             | 3    | 85  | 135 | 54  | 1 | 0 | 0 | 0 |
| 39 | 49 | F | 65 | L't trochanter | Stroke                               | DM                                                               | Staphylococcus aureus, Proteus mirabilis, Diphtheroid | 1 | TFL hatchet flap | 29   | 96  | 42  | 31  | 1 | 0 | 0 | 0 |
| 40 | 50 | M | 54 | R't trochanter | Traumatic spinal cord injury         | HTN, Alcoholism, Liver cirrhosis                                 | Mixed flora                                           | 3 | TFL              | 60   | 235 | 132 | 33  | 1 | 0 | 0 | 0 |
| 40 | 51 | M | 59 | Sacral         | Traumatic spinal cord injury         | HTN, Alcoholism, Liver cirrhosis                                 | Proteus mirabilis, Bacteroides fragilis               | 2 | V-Y              | 0.5  | 96  | 160 | 24  | 0 | 1 | 0 | 1 |
| 41 | 52 | F | 76 | Sacral         | Cardiac arrest s/p ACLS with hypoxia | HTN, DM                                                          | No growth                                             | 1 | SGAP             | 2.25 | 120 | 81  | 13  | 1 | 0 | 0 | 0 |
| 42 | 53 | M | 83 | Sacral         | CAD s/p CABG                         | CAD, Atrial fibrillation, DM, HTN, ESRD, Hyperuricemia.          | Bacteroides fragilis                                  | 2 | V-Y              | 4    | 70  | 90  | 114 | 0 | 0 | 1 | 1 |
| 43 | 54 | F | 89 | Sacral         | Fracture of femur neck               | HTN                                                              | MSSA, Salmonella group B, Bact. thetaiotaomicron      | 2 | Primary closure  | 4    | 36  | 60  | 46  | 1 | 0 | 0 | 0 |
| 44 | 55 | F | 88 | Sacral         | Stroke                               | HTN                                                              | Mixed flora                                           | 4 | V-Y              | 21   | 83  | 56  | 28  | 1 | 0 | 0 | 0 |
| 44 | 56 | F | 89 | bil. PSIS      | Stroke                               | HTN                                                              | No growth                                             | 2 | Primary closure  | 12   | 25  | 9   | 19  | 1 | 0 | 0 | 0 |
| 45 | 57 | F | 86 | L't trochanter | Dementia                             | HTN, VHD, Atrial fibrillation                                    | No growth                                             | 1 | Primary closure  | 17   | 37  | 20  | 22  | 1 | 0 | 0 | 0 |
| 45 | 58 | F | 88 | Sacral         | Dementia                             | HTN, VHD, Atrial fibrillation                                    | Mixed flora                                           | 2 | V-Y              | 3    | 55  | 30  | 34  | 1 | 0 | 0 | 0 |

|    |    |   |    |                  |                              |                        |                                                                                           |   |                     |     |     |      |     |   |   |   |   |
|----|----|---|----|------------------|------------------------------|------------------------|-------------------------------------------------------------------------------------------|---|---------------------|-----|-----|------|-----|---|---|---|---|
| 46 | 59 | M | 81 | Sacral           | Dementia                     | HTN, Lung cancer, COPD | Escherichia coli, Proteus mirabilis                                                       | 3 | V-Y                 | 8   | 48  | 36   | 20  | 1 | 0 | 0 | 0 |
| 47 | 60 | F | 63 | Sacral           | Parkinsonism disease         | Nil                    | Mixed flora                                                                               | 3 | V-Y                 | 1.5 | 118 | 110  | 22  | 1 | 0 | 0 | 0 |
| 48 | 61 | M | 79 | R't trochanter   | Dementia                     | HTN, CAD               | Pseudo. aeruginosa                                                                        | 1 | Primary closure     | 48  | 30  | 20   | 45  | 1 | 0 | 0 | 0 |
| 48 | 62 | M | 79 | L't iliac creast | Dementia                     | HTN, CAD               | Pseudo. aeruginosa                                                                        | 3 | Primary closure     | 48  | 47  | 50   | 45  | 0 | 0 | 1 | 0 |
| 48 | 63 | M | 79 | L't trochanter   | Dementia                     | HTN, CAD               | Pseudo. aeruginosa                                                                        | 2 | hatchet flap        | 48  | 52  | 25   | 45  | 1 | 0 | 0 | 0 |
| 49 | 64 | F | 78 | Sacral           | Dementia                     | HTN, DM2, Cachexia     | No growth                                                                                 | 4 | V-Y                 | 26  | 59  | 64   | 104 | 1 | 0 | 0 | 0 |
| 49 | 65 | F | 78 | Back             | Dementia                     | HTN, DM2, Cachexia     | No growth                                                                                 | 5 | rhomboid local flap | 26  | 53  | 110  | 104 | 0 | 1 | 0 | 0 |
| 50 | 66 | M | 62 | R't trochanter   | Traumatic spinal cord injury | HTN, DM                | Mixed flora                                                                               | 5 | TFL hatchet flap    | 54  | 136 | 25   | 107 | 0 | 1 | 0 | 0 |
| 51 | 67 | F | 87 | Sacral           | Dementia                     | HTN                    | Bacteroides fragilis, Fusobacterium mortiferum                                            | 2 | V-Y                 | 23  | 83  | 72   | 30  | 1 | 0 | 0 | 0 |
| 52 | 68 | F | 83 | L't trochanter   | Stroke                       | HTN, DM                | Peptostrepto. anaerobicus, Prevotella denticola, Bacteroides fragilis                     | 3 | Primary closure     | 31  | 61  | 20   | 55  | 1 | 0 | 0 | 0 |
| 52 | 69 | F | 83 | R't trochanter   | Stroke                       | HTN, DM                | Peptostrepto. anaerobicus, Prevotella denticola, Bacteroides fragilis                     | 2 | TFL hatchet flap    | 31  | 70  | 40   | 55  | 1 | 0 | 0 | 0 |
| 52 | 70 | F | 83 | Sacral           | Stroke                       | HTN, DM                | Peptostrepto. anaerobicus, Prevotella denticola, Bacteroides fragilis                     | 1 | SGAP                | 30  | 140 | 150  | 55  | 1 | 0 | 0 | 0 |
| 53 | 71 | F | 84 | Sacral           | Traumatic brain injury       | CKD, HTN, DM2, CAD     | Enterococcus raffinosus, Enterococcus faecium, Bacteroides fragilis, Peptostrepto. Magnus | 2 | V-Y                 | 11  | 84  | 60   | 81  | 0 | 1 | 0 | 0 |
| 54 | 72 | M | 96 | Sacral           | Stroke                       | CHF, HTN, CKD          | VRE                                                                                       | 3 | V-Y                 | 3   | 60  | 96   | 78  | 0 | 1 | 0 | 0 |
| 55 | 73 | M | 63 | L't shoulder     | Stroke                       | HTN, DM, PAOD          | Mixed flora                                                                               | 3 | Primary closure     | 15  | 22  | 28   | 47  | 1 | 0 | 0 | 0 |
| 55 | 74 | M | 63 | L't trochanter   | Stroke                       | HTN, DM, PAOD          | Mixed flora                                                                               | 4 | Primary closure     | 15  | 36  | 38.5 | 47  | 1 | 0 | 0 | 0 |
| 55 | 75 | M | 63 | Sacral           | Stroke                       | HTN, DM, PAOD          | Mixed flora                                                                               | 5 | V-Y                 | 15  | 83  | 80   | 47  | 1 | 0 | 0 | 0 |
| 56 | 76 | M | 92 | Sacral           | Dementia                     | HTN                    | No growth                                                                                 | 1 | V-Y                 | 26  | 38  | 42   | 18  | 1 | 0 | 0 | 0 |

|    |    |   |    |                |                              |                                                    |                                                                |   |                  |     |     |     |     |   |   |   |   |
|----|----|---|----|----------------|------------------------------|----------------------------------------------------|----------------------------------------------------------------|---|------------------|-----|-----|-----|-----|---|---|---|---|
| 57 | 77 | F | 91 | L't trochanter | Dementia                     | HTN                                                | Bacteroides ovatus, Bact. distasonis                           | 3 | TFL hatchet flap | 0.5 | 183 | 40  | 22  | 1 | 0 | 0 | 1 |
| 57 | 78 | F | 91 | R't trochanter | Dementia                     | HTN                                                | Bacteroides ovatus, Bact. distasonis                           | 3 | TFL hatchet flap | 0.5 | 132 | 80  | 22  | 1 | 0 | 0 | 1 |
| 58 | 79 | F | 45 | Sacral         | Major trauma                 | Nil                                                | MDRAB                                                          | 4 | Primary closure  | 48  | 70  | 60  | 51  | 1 | 0 | 0 | 0 |
| 59 | 80 | F | 85 | Sacral         | Dementia                     | HTN                                                | Mixed flora                                                    | 3 | V-Y              | 2   | 146 | 81  | 43  | 0 | 1 | 0 | 0 |
| 60 | 81 | M | 89 | Sacral         | Fracture of femur neck       | COPD, HTN                                          | Acineto. Baumannii                                             | 2 | V-Y              | 1.5 | 72  | 42  | 23  | 1 | 0 | 0 | 0 |
| 60 | 82 | M | 89 | Sacral         | Fracture of femur neck       | COPD, HTN                                          | Mixed flora                                                    | 4 | SGAP             | 3   | 181 | 150 | 35  | 1 | 0 | 0 | 0 |
| 61 | 83 | F | 85 | R't trochanter | Parkinson disease            | HTN, CHF                                           | MSSA, Bacteroides fragilis                                     | 2 | Primary closure  | 29  | 33  | 24  | 25  | 1 | 0 | 0 | 0 |
| 61 | 84 | F | 87 | Sacral         | Parkinson disease            | HTN, CHF                                           | No growth                                                      | 1 | Primary closure  | 3   | 21  | 10  | 11  | 1 | 0 | 0 | 0 |
| 62 | 85 | M | 63 | Sacral         | Stroke                       | HTN                                                | No growth                                                      | 1 | V-Y              | 43  | 84  | 35  | 97  | 1 | 0 | 0 | 0 |
| 63 | 86 | F | 73 | Sacral         | Stroke                       | HTN, DM                                            | Pseudo. aeruginosa                                             | 2 | SGAP             | 42  | 135 | 144 | 30  | 1 | 0 | 0 | 0 |
| 64 | 87 | M | 87 | Sacral         | Stroke                       | HTN, CHF                                           | Mixed flora                                                    | 2 | V-Y              | 38  | 76  | 72  | 22  | 1 | 0 | 0 | 0 |
| 65 | 88 | M | 84 | Sacral         | Parkinsonism                 | CKD, Atrial fibrillation, CAD                      | Pseudo. aeruginosa, Escherichia coli                           | 2 | V-Y              | 9   | 111 | 132 | 34  | 1 | 0 | 0 | 0 |
| 66 | 89 | F | 71 | Sacral         | Dementia                     | DM, dyslipidemia                                   | Klebsiella pneumoniae                                          | 2 | V-Y              | 10  | 107 | 42  | 55  | 1 | 0 | 0 | 0 |
| 67 | 90 | F | 86 | Sacral         | Dementia                     | DM                                                 | Mixed flora                                                    | 3 | V-Y              | 38  | 121 | 64  | 78  | 0 | 1 | 0 | 0 |
| 68 | 91 | M | 82 | L't trochanter | Stroke                       | DM, HTN, CKD, Hyperlipidemia, Atrial fibrillation  | Mixed flora                                                    | 3 | pALT             | 37  | 108 | 77  | 35  | 1 | 0 | 0 | 1 |
| 69 | 92 | M | 67 | Sacral         | CAD s/p CABG                 | CAD, DM, HTN, PAOD                                 | Klebsiella pneumoniae, VRE                                     | 2 | V-Y              | 5   | 86  | 78  | 280 | 0 | 0 | 1 | 1 |
| 70 | 93 | F | 84 | Sacral         | Dementia                     | CKD, CHF, HTN, Parkinson disease, Senile dementia. | Acineto. calcoaceticus-baumannii complex, Enterococcus faecium | 2 | V-Y              | 20  | 136 | 90  | 96  | 1 | 0 | 0 | 0 |
| 70 | 94 | F | 84 | Sacral         | Dementia                     | CKD, CHF, HTN, Parkinson disease, Senile dementia. | No growth                                                      | 1 | Primary closure  | 15  | 31  | 20  | 96  | 0 | 1 | 0 | 0 |
| 71 | 95 | M | 31 | L't heel       | Traumatic spinal cord injury | Nil                                                | Mixed flora                                                    | 2 | Medial plantar   | 22  | 229 | 25  | 12  | 1 | 0 | 0 | 0 |

|    |     |   |    |                |                                                          |                                              |                                                                                 |    |                  |     |     |     |                                  |   |   |   |   |
|----|-----|---|----|----------------|----------------------------------------------------------|----------------------------------------------|---------------------------------------------------------------------------------|----|------------------|-----|-----|-----|----------------------------------|---|---|---|---|
| 72 | 96  | M | 73 | Sacral         | Stroke                                                   | Nil                                          | No growth                                                                       | 1  | SGAP             | 10  | 100 | 88  | 14                               | 1 | 0 | 0 | 0 |
| 73 | 97  | F | 58 | Sacral         | Breast ca with multiple mets and spinal cord compression | Breast cancer                                | No growth                                                                       | 2  | V-Y              | 3   | 77  | 96  | 110                              | 1 | 0 | 0 | 0 |
| 74 | 98  | M | 66 | L't trochanter | ICH                                                      | Old CVA, HTN, HCV related chronic hepatitis. | Morganella morganii, Peptostrepto. Magnus, Bacteroides fragilis                 | 4  | pALT             | 2   | 173 | 81  | 57                               | 0 | 1 | 0 | 0 |
| 75 | 99  | F | 70 | Sacral         | Dementia                                                 | HTN, DM                                      | MRSA, Escherichia coli, Pseudo. aeruginosa                                      | 3  | Primary closure  | 41  | 29  | 44  | 30                               | 1 | 0 | 0 | 0 |
| 76 | 100 | M | 73 | Sacral         | Parkinsonism                                             | DM                                           | Coagulase Negative Staphylococcus                                               | 1  | V-Y              | 1   | 70  | 20  | 16                               | 1 | 0 | 0 | 0 |
| 77 | 101 | M | 49 | Sacral         | Transverse myelitis with myelopathy of lower limbs       | DM, Alcoholic related liver cirrhosis        | VRE                                                                             | 2  | V-Y              | 2   | 112 | 60  | 50                               | 1 | 0 | 0 | 0 |
| 78 | 102 | M | 78 | R't back       | *. Old CVA                                               | HTN, DM, CAD                                 | *. Enterococcus faecalis<br>*. Enterobacter cloacae<br>*. Klebsiella pneumoniae | 1  | PC+CINPWT        | 38  | 19  | 12  | 14                               | 1 | 0 | 0 | 0 |
| 79 | 103 | M | 79 | Sacral         | Fracture of femur, intertrochanteric                     | Nil                                          | Enterococcus faecium                                                            | 2  | SGAP             | 13  | 116 | 108 | 113                              | 1 | 0 | 0 | 0 |
| 80 | 104 | F | 84 | Sacral         | Stroke                                                   | DM, HTN                                      | XDRAB                                                                           | 3  | Primary closure  | 4   | 29  | 36  | 126                              | 0 | 1 | 0 | 1 |
| 81 | 105 | F | 89 | Sacral         | Leukoencephalopathy                                      | DM, HTN                                      | Mixed flora                                                                     | 1  | V-Y              | 23  | 80  | 12  | 10                               | 1 | 0 | 0 | 0 |
| 82 | 106 | F | 88 | Sacral         | Fracture of femur, intertrochanteric                     | Hypothyroidism                               | Escherichia coli, Morganella morganii, Bacteroides fragilis                     | 1  | V-Y              | 46  | 82  | 12  | 17                               | 1 | 0 | 0 | 0 |
| 83 | 107 | M | 65 | Sacral         | Parkinsonism                                             | HTN, CAD, Old CVA                            | Staphylococcus aureus, Corynebacterium spp                                      | 1  | V-Y              | 8   | 53  | 35  | 10                               | 1 | 0 | 0 | 0 |
| 84 | 108 | F | 90 | Sacral         | Dementia                                                 | HTN                                          | MRSA, Morganella morganii, Escherichia coli                                     | 2  | V-Y              | 1   | 65  | 56  | 28                               | 1 | 0 | 0 | 1 |
| 85 | 109 | F | 71 | ischial        | Old fracture of femur, intertrochanteric, left           | nil                                          | No growth                                                                       | 3  | pALT             | 4   | 213 | 150 | 38                               | 1 | 0 | 0 | 0 |
| 86 | 110 | M | 65 | Sacral         | Traumatic spinal cord injury                             | Nil                                          | Mixed flora                                                                     | 18 | SGAP             | 41  | 93  | 77  | Still stay due to special reason | 1 | 1 | 0 | 0 |
| 87 | 111 | M | 77 | L't ischial    | Spinal cord ischemia                                     | HTN, PAOD, Hyperuricemia                     | Enterococcus faecalis                                                           | 1  | Primary closure  | 55  | 49  | 18  | 16                               | 1 | 0 | 0 | 0 |
| 88 | 112 | F | 86 | Sacral         | Stroke                                                   | DM, HTN, CKD, Dyslipidemia                   | Morganella morganii, Bacteroides fragilis, Bacteroides ovatus                   | 2  | V-Y              | 1   | 36  | 25  | 40                               | 0 | 1 | 0 | 1 |
| 89 | 113 | M | 70 | Sacral         | Dementia                                                 | HTN, DM                                      | Mixed flora                                                                     | 1  | Primary closure  | 1.5 | 40  | 24  | 61                               | 1 | 0 | 0 | 0 |
| 89 | 114 | M | 70 | R't trochanter | Dementia                                                 | HTN, DM                                      | Mixed flora                                                                     | 5  | TFL hatchet flap | 1.5 | 114 | 36  | 61                               | 1 | 0 | 0 | 0 |

|     |     |   |    |                |                                             |                                                                                    |                                                                                                        |   |                 |     |     |     |     |   |   |   |   |
|-----|-----|---|----|----------------|---------------------------------------------|------------------------------------------------------------------------------------|--------------------------------------------------------------------------------------------------------|---|-----------------|-----|-----|-----|-----|---|---|---|---|
| 89  | 115 | M | 70 | L't ischial    | Dementia                                    | HTN, DM                                                                            | Mixed flora                                                                                            | 5 | Primary closure | 1   | 40  | 24  | 61  | 1 | 0 | 0 | 0 |
| 89  | 116 | M | 70 | R't ischial    | Dementia                                    | HTN, DM                                                                            | Mixed flora                                                                                            | 5 | Primary closure | 1   | 29  | 28  | 61  | 0 | 1 | 0 | 0 |
| 90  | 117 | F | 81 | Sacral         | Parkinsonism                                | VHD, CHF, HTN, ESRD, CAD, Sick sinus syndrome s/p parmanent pacemaker implantation | Bacteroides fragilis, Klebsiella pneumoniae                                                            | 3 | V-Y             | 22  | 79  | 120 | 43  | 0 | 1 | 0 | 0 |
| 91  | 118 | M | 80 | Back           | Chronic SDH                                 | Nil                                                                                | Proteus mirabilis, Enterococcus faecalis                                                               | 2 | Primary closure | 54  | 57  | 36  | 32  | 1 | 0 | 0 | 0 |
| 91  | 119 | M | 80 | Sacral         | Chronic SDH                                 | Nil                                                                                | Proteus mirabilis, Enterococcus faecalis                                                               | 3 | V-Y             | 54  | 94  | 30  | 32  | 1 | 0 | 0 | 0 |
| 92  | 120 | M | 58 | Sacral         | Major trauma                                | DM, Hyperlipidemia.                                                                | No growth                                                                                              | 2 | V-Y             | 46  | 95  | 30  | 18  | 1 | 0 | 0 | 0 |
| 93  | 121 | F | 70 | Sacral         | Spondylolisthesis                           | CHF                                                                                | MRSA                                                                                                   | 2 | V-Y             | 31  | 130 | 132 | 97  | 0 | 1 | 0 | 0 |
| 94  | 122 | F | 59 | Sacral         | Parkinsonism                                | DM                                                                                 | Mixed flora                                                                                            | 4 | Primary closure | 5   | 38  | 40  | 86  | 1 | 0 | 0 | 0 |
| 94  | 123 | F | 59 | R't trochanter | Parkinsonism                                | DM                                                                                 | Mixed flora                                                                                            | 7 | pALT            | 4.5 | 183 | 70  | 86  | 1 | 0 | 0 | 0 |
| 94  | 124 | F | 59 | L't trochanter | Parkinsonism                                | DM                                                                                 | Mixed flora                                                                                            | 9 | pALT            | 4   | 146 | 117 | 86  | 1 | 0 | 0 | 0 |
| 95  | 125 | F | 62 | Sacral         | CNS lymphoma                                | HTN                                                                                | Enterococcus faecalis                                                                                  | 2 | V-Y             | 54  | 49  | 20  | 34  | 0 | 1 | 0 | 0 |
| 96  | 126 | F | 87 | Sacral         | Fracture of femur                           | ESRD, VHD, CHF, Atrial fibrillation                                                | MRSA, Escherichia coli, Klebsiella pneumoniae                                                          | 1 | V-Y             | 2   | 50  | 49  | 439 | 1 | 0 | 0 | 0 |
| 97  | 127 | F | 73 | Sacral         | Parkinsonism                                | HTN, DM, CAD                                                                       | Mixed flora                                                                                            | 3 | V-Y             | 50  | 151 | 150 | 40  | 1 | 0 | 0 | 0 |
| 98  | 128 | M | 86 | Sacral         | Stroke                                      | HTN                                                                                | Enterococcus faecalis, Proteus mirabilis, Pseudo. aeruginosa,                                          | 4 | V-Y             | 19  | 108 | 144 | 45  | 1 | 0 | 0 | 0 |
| 99  | 129 | M | 74 | R't ischial    | Poliomyelitis with paralysis of lower limbs | Nil                                                                                | No growth                                                                                              | 1 | Primary closure | 16  | 23  | 20  | 17  | 1 | 0 | 0 | 0 |
| 100 | 130 | M | 89 | Sacral         | Major Depression Disease                    | Nil                                                                                | Klebsiella pneumoniae, Pseudo. aeruginosa, Enterococcus faecalis                                       | 3 | Primary closure | 1   | 65  | 130 | 33  | 1 | 0 | 0 | 0 |
| 101 | 131 | F | 88 | Sacral         | Dementia                                    | Nil                                                                                | Bacteroides fragilis, Peptostrepto. asaccharolyticus, Viridans streptococcus gr, Enterococcus faecalis | 3 | V-Y             | 1   | 106 | 36  | 26  | 1 | 0 | 0 | 0 |
| 102 | 132 | F | 75 | Sacral         | Dementia                                    | Nil                                                                                | Mixed flora                                                                                            | 2 | SGAP            | 13  | 150 | 72  | 58  | 0 | 1 | 0 | 0 |



|     |     |   |    |                |                                        |                    |                                                                                      |    |                  |     |     |     |     |   |   |   |   |
|-----|-----|---|----|----------------|----------------------------------------|--------------------|--------------------------------------------------------------------------------------|----|------------------|-----|-----|-----|-----|---|---|---|---|
| 103 | 133 | M | 21 | Sacral         | Cervical spine injury                  | Nil                | No growth                                                                            | 2  | V-Y              | 27  | 59  | 15  | 339 | 1 | 0 | 0 | 0 |
| 103 | 134 | M | 23 | R't ischial    | Cervical spine injury                  | Nil                | No growth                                                                            | 2  | pALT             | 3   | 229 | 50  | 25  | 1 | 0 | 0 | 0 |
| 104 | 135 | M | 73 | Sacral         | Dementia                               | HTN, DM            | Enterococcus faecalis, Proteus mirabilis, Peptostrepto. anaerobicus, Prevotella spp. | 5  | SGAP             | 1   | 110 | 126 | 56  | 0 | 1 | 0 | 0 |
| 105 | 136 | M | 50 | Sacral         | Fracture of femur                      | HTN, DM            | Mixed flora                                                                          | 6  | V-Y              | 54  | 68  | 56  | 109 | 0 | 0 | 1 | 0 |
| 105 | 137 | M | 50 | Sacral         | Fracture of femur                      | HTN, DM            | Mixed flora                                                                          | 6  | 2nd V-Y          | 54  | 81  | 48  | 109 | 1 | 0 | 0 | 0 |
| 106 | 138 | M | 69 | Sacral         | Stroke                                 | DM, CKD            | Enterococcus faecium, Enterococcus faecalis                                          | 2  | V-Y              | 4.5 | 39  | 25  | 153 | 0 | 1 | 0 | 0 |
| 107 | 139 | M | 68 | Sacral         | Traumatic spinal cord injury           | DM                 | Pseudo. aeruginosa, Proteus mirabilis                                                | 2  | V-Y              | 1   | 53  | 72  | 20  | 1 | 0 | 0 | 0 |
| 108 | 140 | M | 66 | Sacral         | Fracture of femur                      | Nil                | Mixed flora                                                                          | 4  | V-Y              | 4   | 87  | 400 | 114 | 0 | 1 | 0 | 0 |
| 109 | 141 | M | 20 | Sacral         | Traumatic spinal cord injury           | Nil                | Coagulase Negative Staphylococcus                                                    | 2  | SGAP             | 6   | 117 | 25  | 41  | 0 | 1 | 0 | 1 |
| 110 | 142 | F | 87 | Sacral         | Dementia                               | ESRD, DM           | Pseudo. aeruginosa, Enterococcus faecium                                             | 14 | V-Y              | 11  | 83  | 56  | 80  | 0 | 0 | 1 | 0 |
| 110 | 143 | F | 87 | Sacral         | Dementia                               | ESRD, DM           | Pseudo. aeruginosa, Enterococcus faecium                                             | 2  | 2nd V-Y          | 11  | 81  | 48  | 80  | 0 | 1 | 0 | 0 |
| 111 | 144 | F | 53 | Sacral         | Schizophrenia                          | Nil                | No growth                                                                            | 2  | V-Y              | 1   | 68  | 25  | 32  | 1 | 0 | 0 | 0 |
| 112 | 145 | F | 77 | Sacral         | Dementia                               | Nil                | Mixed flora                                                                          | 2  | V-Y              | 1   | 54  | 36  | 19  | 1 | 0 | 0 | 0 |
| 113 | 146 | M | 60 | Sacral         | Amphetamina withdraw, Major depression | Nil                | MRSA                                                                                 | 1  | V-Y              | 2   | 73  | 35  | 28  | 1 | 0 | 0 | 0 |
| 114 | 147 | M | 84 | Sacral         | Dementia                               | HTN, CKD, Dementia | Proteus mirabilis, Flavobacterium species, Corynebacterium spp.                      | 5  | SGAP             | 7   | 194 | 108 | 246 | 0 | 1 | 0 | 0 |
| 115 | 148 | M | 91 | Sacral         | Dementia                               | HTN                | Enterococcus faecalis, Pseudo. Aeruginosa, Peptostrepto. Magnus                      | 1  | V-Y              | 54  | 45  | 48  | 10  | 1 | 0 | 0 | 0 |
| 116 | 149 | F | 85 | R't trochanter | Fracture of femur                      | HTN, VHD, DM2      | No growth                                                                            | 1  | TFL hatchet flap | 52  | 38  | 20  | 15  | 1 | 0 | 0 | 0 |
| 117 | 150 | F | 74 | Sacral         | Dementia                               | DM                 | Mixed flora                                                                          | 1  | Primary closure  | 2   | 43  | 40  | 27  | 1 | 0 | 0 | 0 |
| 118 | 151 | F | 92 | Sacral         | Stroke                                 | HTN, DM            | No growth                                                                            | 1  | V-Y              | 56  | 99  | 30  | 22  | 1 | 0 | 0 | 0 |

|     |     |   |    |                |                                                     |                          |                                             |   |           |    |     |     |    |   |   |   |   |
|-----|-----|---|----|----------------|-----------------------------------------------------|--------------------------|---------------------------------------------|---|-----------|----|-----|-----|----|---|---|---|---|
| 119 | 152 | F | 76 | Sacral         | Status epilepticus                                  | HTN                      | VRE                                         | 2 | V-Y       | 46 | 50  | 30  | 48 | 1 | 0 | 0 | 0 |
| 120 | 153 | F | 76 | Sacral         | Dementia                                            | Nil                      | No growth                                   | 2 | V-Y       | 1  | 46  | 45  | 31 | 0 | 1 | 0 | 0 |
| 121 | 154 | F | 81 | Sacral         | Peritoneal carcinomatosis                           | HTN, Atrial fibrillation | Enterococcus faecium, Klebsiella pneumoniae | 3 | SGAP      | 5  | 93  | 110 | 83 | 0 | 1 | 0 | 0 |
| 122 | 155 | F | 83 | Sacral         | Parkinson disease                                   | Nil                      | Mixed flora                                 | 2 | V-Y       | 37 | 55  | 12  | 21 | 1 | 0 | 0 | 0 |
| 123 | 156 | M | 84 | Sacral         | Parkinson's disease                                 | HTN                      | Mixed flora                                 | 3 | V-Y       | 4  | 119 | 180 | 65 | 0 | 1 | 0 | 0 |
| 124 | 157 | F | 59 | Sacral         | Fracture of femur                                   | DM, Schizophrenia        | Pseudo. aeruginosa, Proteus mirabilis       | 2 | V-Y       | 25 | 74  | 64  | 28 | 1 | 0 | 0 | 0 |
| 125 | 158 | M | 87 | Sacral         | Alzheimer's disease                                 | HTN, DM2, Prostate ca    | Pseudo. aeruginosa                          | 1 | V-Y       | 26 | 66  | 9   | 16 | 1 | 0 | 0 | 0 |
| 126 | 159 | M | 85 | R't trochanter | Spondylopathy                                       | HTN                      | No growth                                   | 2 | GM V-Y    | 48 | 38  | 12  | 10 | 1 | 0 | 0 | 0 |
| 126 | 160 | M | 85 | Sacral         | Recurrent perineal abscess with secondary infection | HTN                      | No growth                                   | 2 | V-Y       | 18 | 63  | 42  | 32 | 1 | 0 | 0 | 0 |
| 127 | 161 | F | 81 | Sacral         | *. Old CVA                                          | HTN, DM, CAD             | *. Escherichia coli                         | 2 | PC+CiNPWT | 17 | 12  | 10  | 10 | 1 | 0 | 0 | 0 |
| 128 | 162 | F | 92 | Sacral         | Dementia                                            | Nil                      | Enterococcus faecalis, Escherichia coli     | 2 | SGAP      | 23 | 130 | 72  | 23 | 1 | 0 | 0 | 0 |
